# Supplementary material for: Safranin and cysteine capped gold nanoparticles: spectroscopic qualitative and quantitative studies
Source: Royal Society of Chemistry journal article supplement (doi:10.1039/c4ra15855e), 2015-01-01
Supplement: c4ra15855e1.pdf [file c4ra15855e1.pdf]

### Supplementary Figures:

|                                | Size (d.nm):         | % Intensity | Width (d.nm) |
|--------------------------------|----------------------|-------------|--------------|
| <b>Z-Average (d.nm):</b> 19.58 | <b>Peak 1:</b> 67.39 | 78.6        | 43.17        |
| <b>Pdl:</b> 0.768              | <b>Peak 2:</b> 2.308 | 21.4        | 0.7418       |
| <b>Intercept:</b> 0.786        | <b>Peak 3:</b> 0.000 | 0.0         | 0.000        |

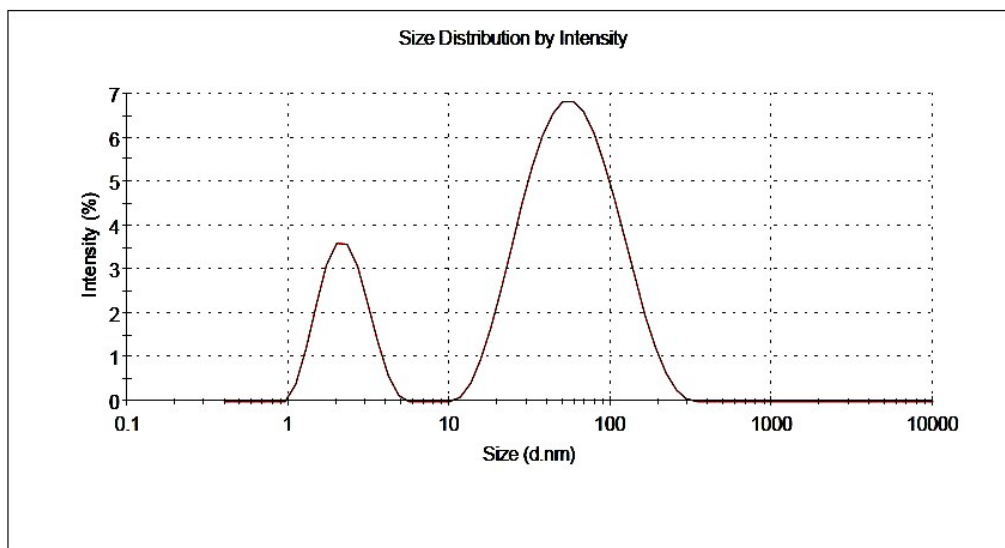

A

|                                   | Mean (mV)            | Area (%) | Width (mV) |
|-----------------------------------|----------------------|----------|------------|
| <b>Zeta Potential (mV):</b> -56.3 | <b>Peak 1:</b> -56.2 | 99.7     | 9.47       |
| <b>Zeta Deviation (mV):</b> 9.88  | <b>Peak 2:</b> -109  | 0.3      | 1.86       |
| <b>Conductivity (mS/cm):</b> 1.25 | <b>Peak 3:</b> 0.00  | 0.0      | 0.00       |

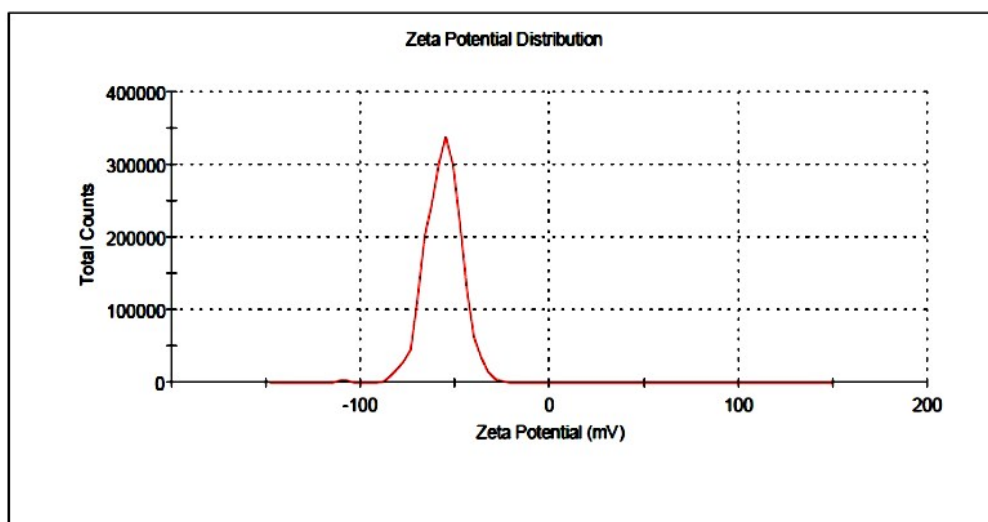

B

Fig. S1

|                                | Size (d.nm):         | % Intensity | Width (d.n... |
|--------------------------------|----------------------|-------------|---------------|
| <b>Z-Average (d.nm):</b> 657.5 | <b>Peak 1:</b> 850.2 | 99.0        | 413.9         |
| <b>Pdl:</b> 0.254              | <b>Peak 2:</b> 5126  | 1.0         | 509.7         |
| <b>Intercept:</b> 0.854        | <b>Peak 3:</b> 0.000 | 0.0         | 0.000         |

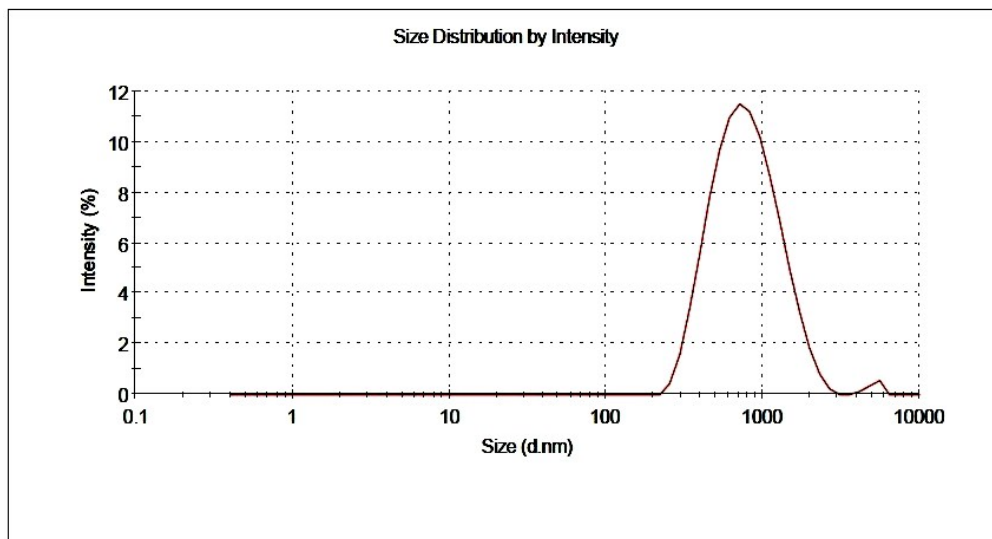

A

|                                   | Mean (mV)           | Area (%) | Width (mV) |
|-----------------------------------|---------------------|----------|------------|
| <b>Zeta Potential (mV):</b> 5.22  | <b>Peak 1:</b> 5.22 | 100.0    | 5.97       |
| <b>Zeta Deviation (mV):</b> 5.97  | <b>Peak 2:</b> 0.00 | 0.0      | 0.00       |
| <b>Conductivity (mS/cm):</b> 2.58 | <b>Peak 3:</b> 0.00 | 0.0      | 0.00       |

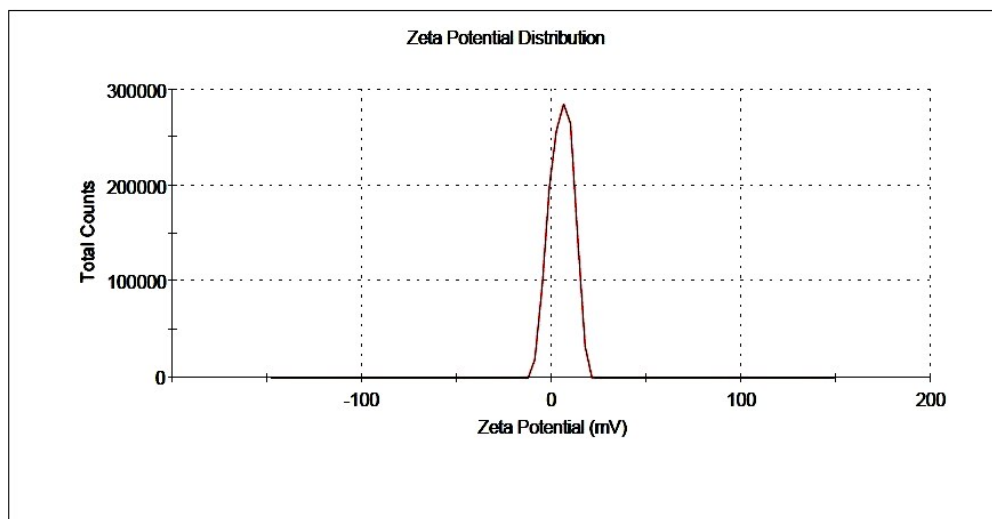

B

Fig. S2

|                                   | Mean (mV)    | Area (%) | Width (mV) |
|-----------------------------------|--------------|----------|------------|
| <b>Zeta Potential (mV):</b> 6.74  | Peak 1: 6.74 | 100.0    | 3.94       |
| <b>Zeta Deviation (mV):</b> 3.94  | Peak 2: 0.00 | 0.0      | 0.00       |
| <b>Conductivity (mS/cm):</b> 2.56 | Peak 3: 0.00 | 0.0      | 0.00       |

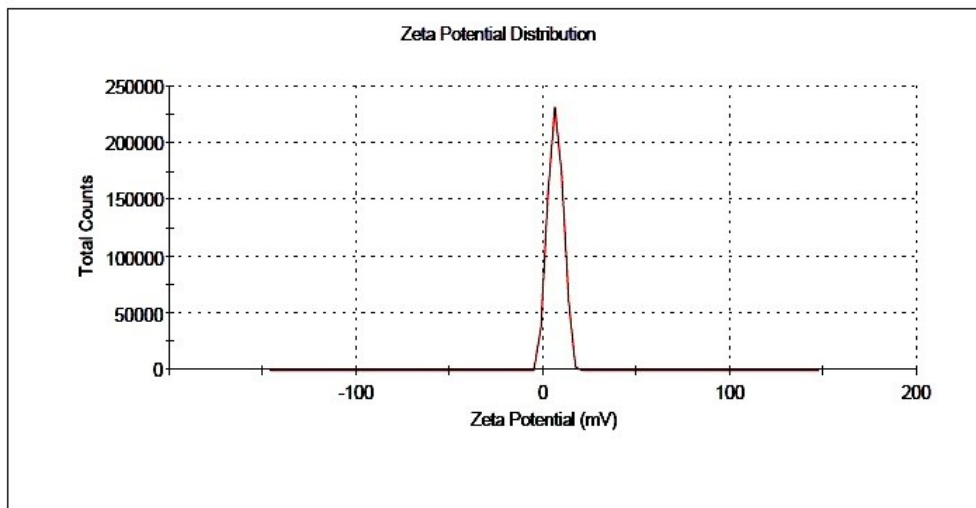

A

|                               | Size (d.nm):  | % Intensity | Width (d.n...) |
|-------------------------------|---------------|-------------|----------------|
| <b>Z-Average (d.nm):</b> 1484 | Peak 1: 895.3 | 100.0       | 123.9          |
| <b>Pdl:</b> 0.443             | Peak 2: 0.000 | 0.0         | 0.000          |
| <b>Intercept:</b> 0.898       | Peak 3: 0.000 | 0.0         | 0.000          |

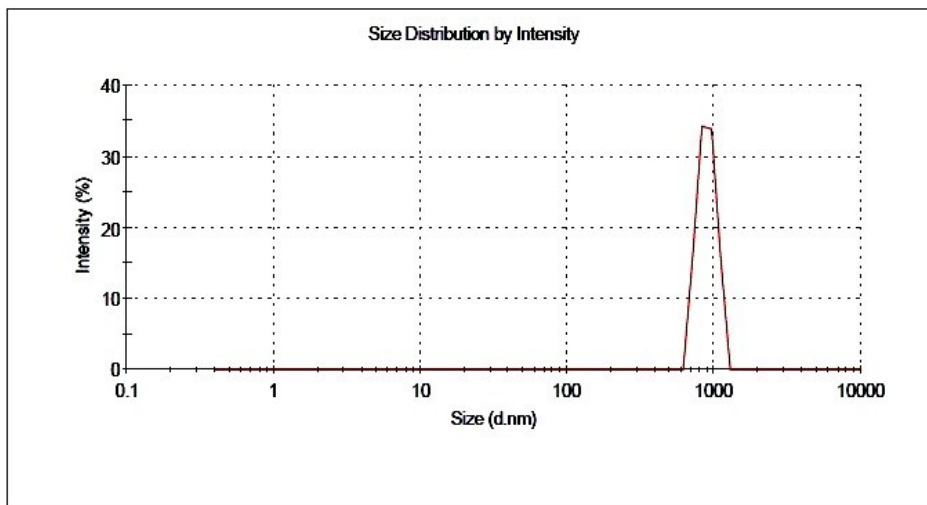

B

Fig. S3
